# Supplementary figures and images for: A microfluidic hanging drop-based spheroid co-culture platform for probing tumor angiogenesis
Source: Royal Society of Chemistry journal article supplement (doi:10.1039/d1lc01177d), 2022-01-01

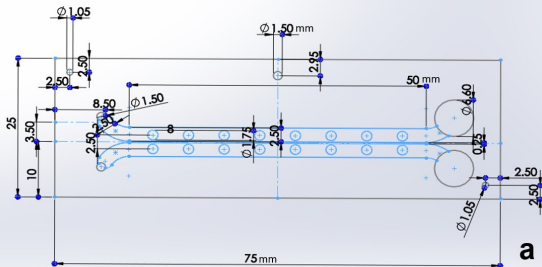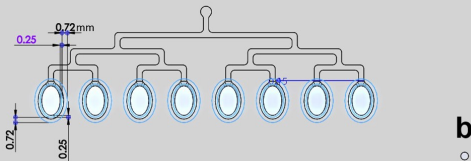

Supplement: d1lc01177d1.pdf [file d1lc01177d1.pdf]

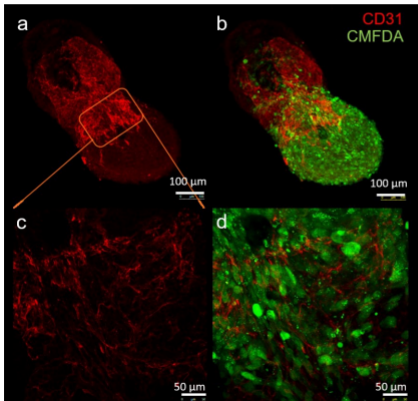

Supplement: d1lc01177d2.pdf [file d1lc01177d2.pdf]

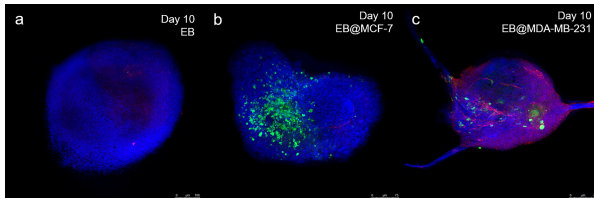

Supplement: d1lc01177d3.pdf [file d1lc01177d3.pdf]

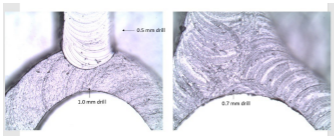

Supplement: d1lc01177d4.pdf [file d1lc01177d4.pdf]

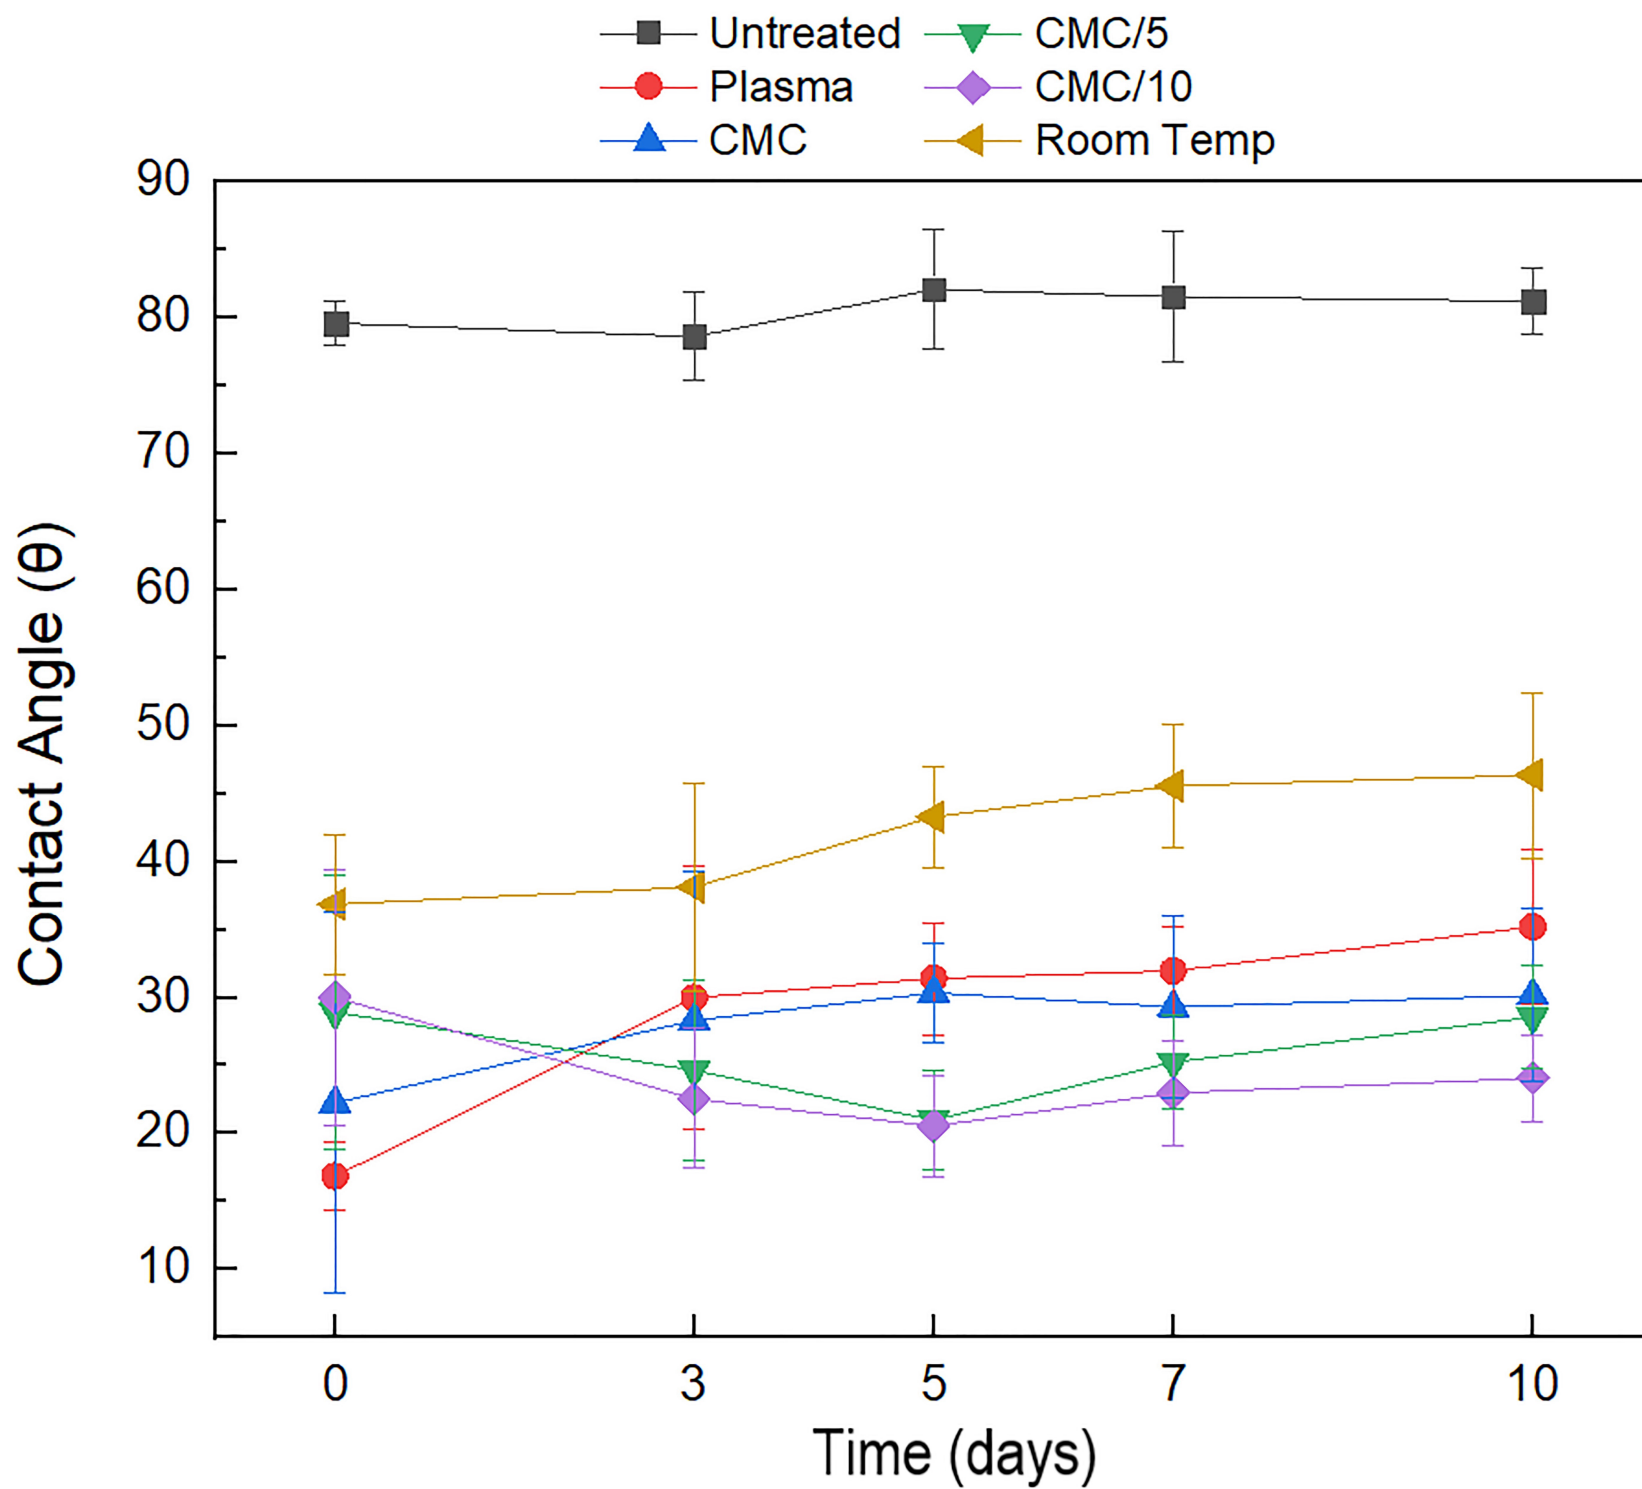

Supplement: d1lc01177d5.pdf [file d1lc01177d5.pdf]

**MDA-MB-231**

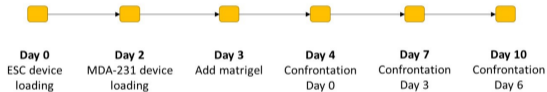

**MCF-7**

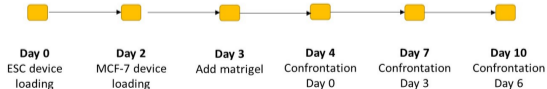

Supplement: d1lc01177d6.pdf [file d1lc01177d6.pdf]

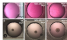

Supplement: d1lc01177d7.pdf [file d1lc01177d7.pdf]
